# Supplementary material for: Ag nanoparticles/hematite mesocrystals superstructure composite: a facile synthesis and enhanced heterogeneous photo-Fenton activity
Source: Royal Society of Chemistry journal article supplement (doi:10.1039/c6cy00080k), 2016-01-01
Supplement: c6cy00080k1.pdf [file c6cy00080k1.pdf]

## Supplementary Information

### **Ag Nanoparticles / Hematite Mesocrystals Superstructure Composite: a Facile Synthesis and Enhanced Heterogeneous Photo-Fenton Activity**

Xianjie Chen,<sup>a</sup> Fangge Chen,<sup>a</sup> Fenglin Liu,<sup>a</sup> Xiaodong Yan,<sup>b</sup> Wei Hu,<sup>a</sup> Ganbing Zhang,<sup>a</sup> Lihong Tian,<sup>\*ab</sup> Qinghua Xia<sup>a</sup>  
and Xiaobo Chen<sup>\*b</sup>

<sup>a</sup> *Hubei Collaborative Innovation Center for Advanced Organochemical Materials; Ministry-of-Education Key  
Laboratory for the Synthesis and Applications of Organic Functional Molecules, Hubei University, Wuhan 430062,  
P. R. China.*

<sup>b</sup> *Department of Chemistry, University of Missouri-Kansas City, Kansas City, Missouri 64110, USA*

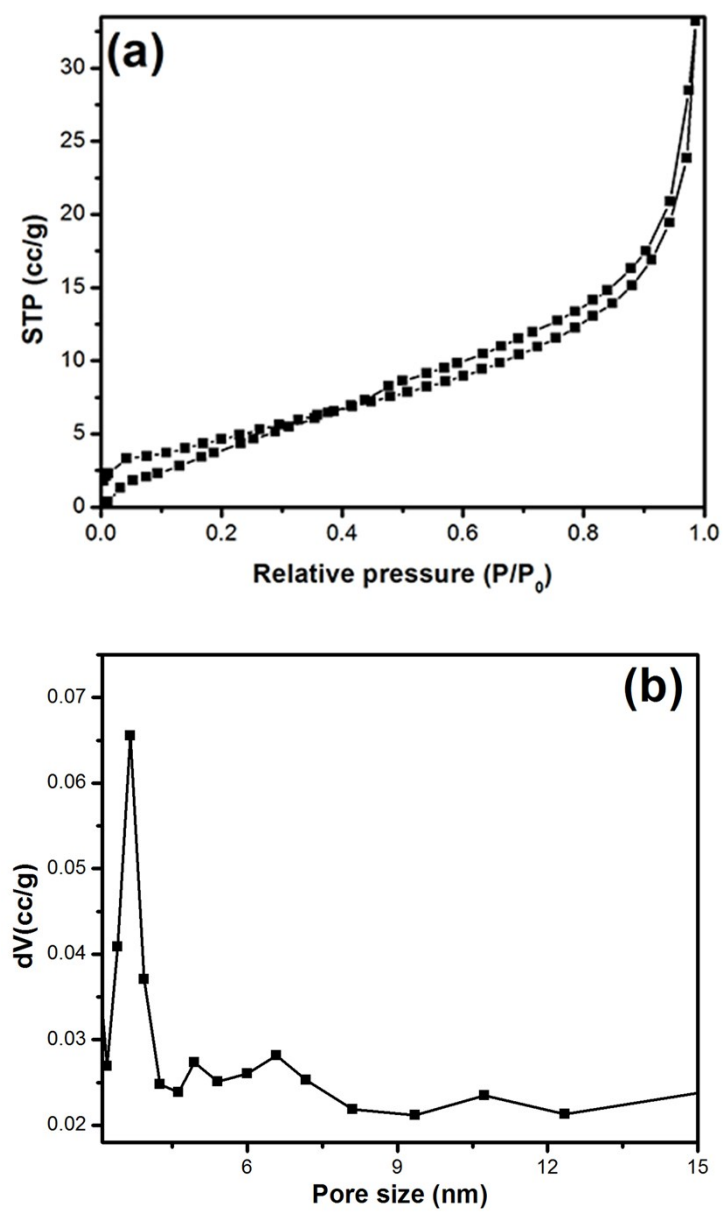

**Fig. S1.** Nitrogen adsorption–desorption isotherms (a) and pore size distribution (b) of Fe<sub>2</sub>O<sub>3</sub> MCs

**Table S1.** A comparison of BET surface areas and average pore distribution of Fe<sub>2</sub>O<sub>3</sub> MCs and Ag / Fe<sub>2</sub>O<sub>3</sub> MCs composites.

| Samples                              | Fe <sub>2</sub> O <sub>3</sub> MCs | Ag/ Fe <sub>2</sub> O <sub>3</sub> MCs-1% | Ag/ Fe <sub>2</sub> O <sub>3</sub> MCs-2% | Ag/ Fe <sub>2</sub> O <sub>3</sub> MCs-3% |
|--------------------------------------|------------------------------------|-------------------------------------------|-------------------------------------------|-------------------------------------------|
| BET surface area (m <sup>2</sup> /g) | 18.8                               | 14.0                                      | 17.9                                      | 9.77                                      |
| Average pore size (nm)               | 3.69                               | 3.72                                      | 3.65                                      | 3.68                                      |

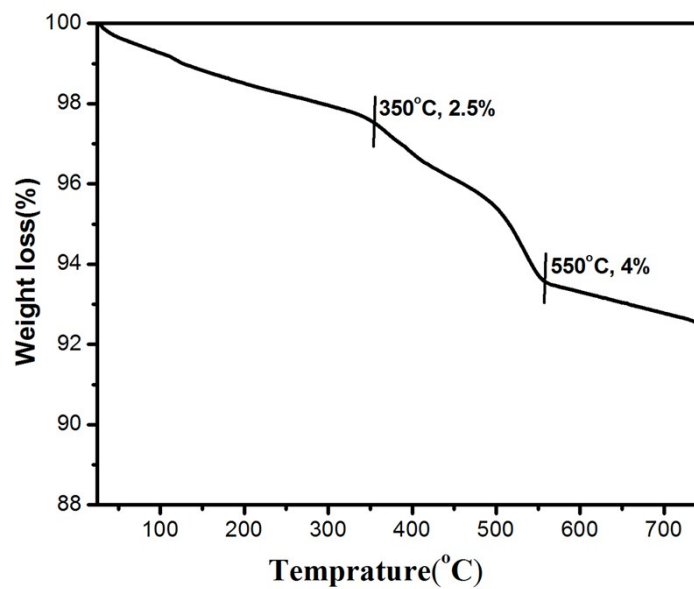

**Fig. S2.** TG-DTA curve of as-prepared Fe<sub>2</sub>O<sub>3</sub> MCs.

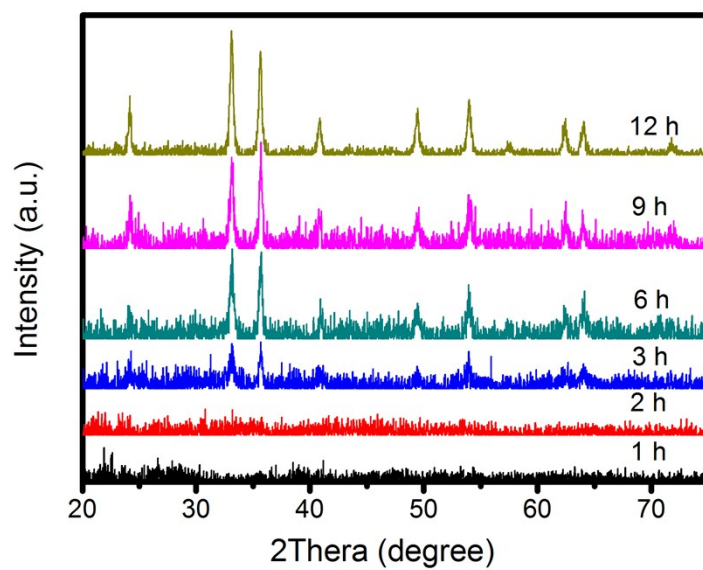

**Fig. S3** Time-dependent XRD patterns of hematite mesocrystals during the solvothermal process

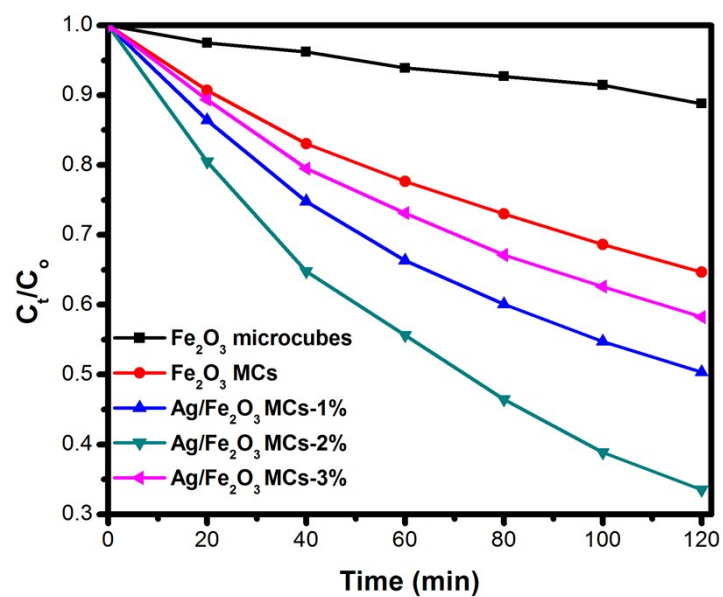

**Fig. S4.** Photocatalytic degradation of MO with the presence of  $H_2O_2$  by different photocatalysts under visible light irradiation.

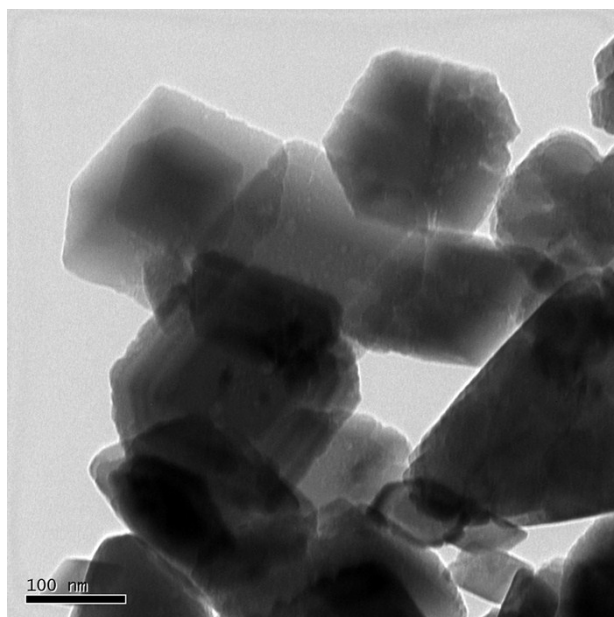

**Fig. S5.** TEM image of  $Fe_2O_3$  nanocubes

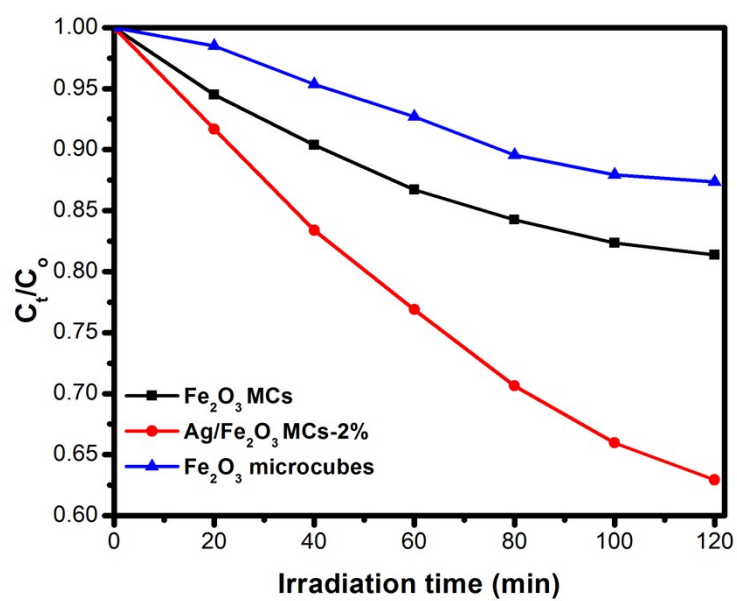

**Fig. S6.** The photocatalytic degradation of RhB over Fe<sub>2</sub>O<sub>3</sub> MCs, Ag/Fe<sub>2</sub>O<sub>3</sub> MCs-2% and Fe<sub>2</sub>O<sub>3</sub> microcubes without the addition of H<sub>2</sub>O<sub>2</sub> under visible light.

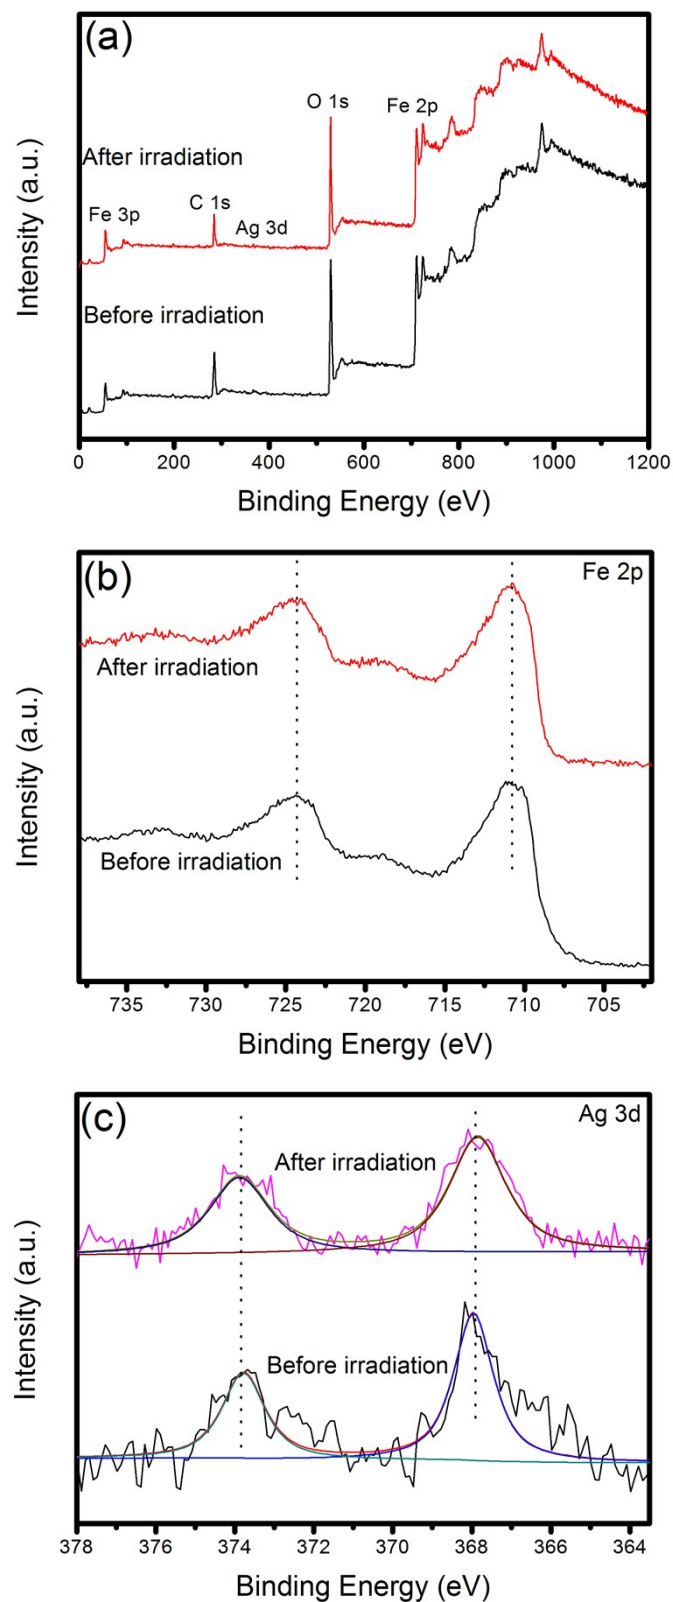

**Fig. S7.** The XPS spectrum of Ag/Fe<sub>2</sub>O<sub>3</sub> MCs-2% before and after irradiation for 2 h, the whole spectra (a), Fe 2p (b), Ag 3d (c).

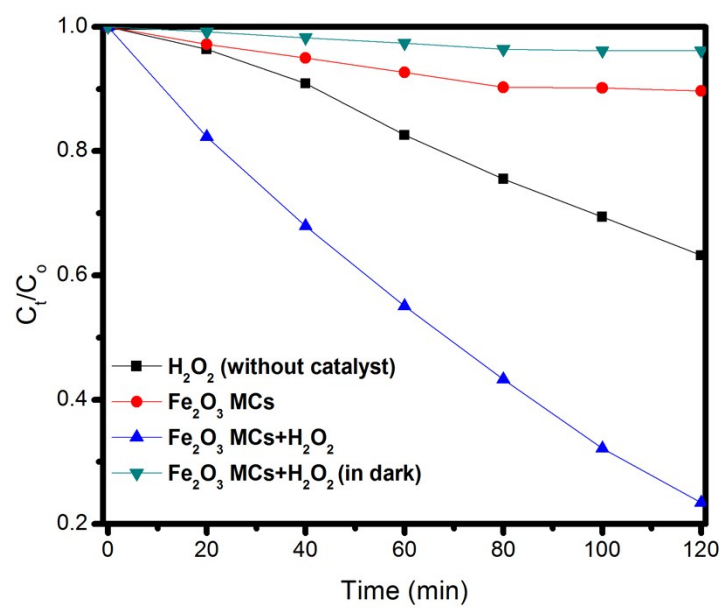

**Fig. S8.** Photocatalytic mechanism experiments of the degradation of RhB under visible light irradiation.
